# Supplementary material for: Data in support of the identification of neuronal and astrocyte proteins interacting with extracellularly applied oligomeric and fibrillar α-synuclein assemblies by mass spectrometry
Source: PubMed Central journal article supplement (PMC4773484; doi:10.1016/j.dib.2016.02.018), 2016-02-12
Supplement: mmc2.pdf [file mmc2.pdf]

**Table 1****List of proteins from whole neurons lysates interacting with extracellularly applied oligomeric  $\alpha$ -syn**

Fold change corresponds to the average spectral count ratio between exposed cells and control cells of three independent replicates.  $\infty$ : the spectral count ratio is infinite as the protein is pulled-down only with oligomeric  $\alpha$ -synuclein.

Membrane and/or extracellular proteins are indicated as determined using the NCBI annotation tool of the Scaffold software based on Gene Ontology (GO) cell component term annotations. References describing extracellular exposure in peer-reviewed articles are indicated. **In bold**, the unique plasma membrane protein pulled-down both with oligomeric and fibrillar  $\alpha$ -synuclein and presenting both transmembrane and extracellularly exposed regions.

| Protein Name                                                      | Gene Name     | Accession Number | Fold Change (Syn/Ctrl) | GO cell component term annotations from NCBI |                 |                      | Experimental description of extracellular exposure in peer-reviewed articles |
|-------------------------------------------------------------------|---------------|------------------|------------------------|----------------------------------------------|-----------------|----------------------|------------------------------------------------------------------------------|
|                                                                   |               |                  |                        | Membrane                                     | Plasma membrane | Extracellular region |                                                                              |
| 40S ribosomal protein S28                                         | Rps28         | P62858           | 7.0                    |                                              |                 | +                    |                                                                              |
| 40S ribosomal protein S5                                          | Rps5          | P24050           | 2.2                    |                                              |                 |                      |                                                                              |
| 78 kDa glucose-regulated protein                                  | Hspa5         | P06761           | 5.4                    | +                                            | +               | +                    | + [16,17]                                                                    |
| AP-3 complex subunit delta-1                                      | Ap3d1         | O54774           | 1.8                    | +                                            |                 |                      |                                                                              |
| ATP synthase subunit beta, mitochondrial                          | Atp5b         | P10719           | 2.0                    | +                                            |                 |                      |                                                                              |
| Calcium/calmodulin-dependent protein kinase type II subunit gamma | Camk2g        | P11730           | 2.1                    | +                                            |                 |                      |                                                                              |
| Calmodulin                                                        | Calm1         | P62161           | 2.5                    | +                                            | +               | +                    |                                                                              |
| Creatine kinase B-type                                            | Ckb           | P07335           | 5.0                    | +                                            | +               | +                    |                                                                              |
| Cytoskeleton-associated protein 5                                 | Ckap5         | A2AGT5           | 1.7                    | +                                            |                 |                      |                                                                              |
| Dihydropyrimidinase-related protein 3                             | Dpysl3        | Q62188           | 2.1                    |                                              |                 | +                    |                                                                              |
| Double-stranded RNA-binding protein Staufer homolog 2             | Stau2         | Q685B1           | 1.6                    |                                              |                 |                      |                                                                              |
| Elongation factor 2                                               | Eef2          | P05197           | 2.0                    | +                                            |                 | +                    |                                                                              |
| Elongation factor Tu, mitochondrial                               | Tufm          | P85834           | 5.0                    | +                                            |                 | +                    |                                                                              |
| ERC protein 2                                                     | Erc2          | Q8K3M6           | 3.5                    | +                                            | +               |                      |                                                                              |
| Fragile X mental retardation syndrome-related protein 1           | Fxr1          | Q61584           | 2.0                    | +                                            |                 |                      |                                                                              |
| Friend of PRMT1 protein                                           | Fop           | Q9CY57           | 2.0                    |                                              |                 |                      |                                                                              |
| GMP synthase [glutamine-hydrolyzing]                              | Gmps          | Q3THK7           | 2.0                    |                                              |                 |                      |                                                                              |
| Heterogeneous nuclear ribonucleoprotein K                         | Hnrnpk        | P61979           | 1.8                    | +                                            | +               | +                    |                                                                              |
| Kinesin-like protein KIF2A                                        | Kif2a         | P28740           | 1.6                    | +                                            |                 |                      |                                                                              |
| Myb-binding protein 1A                                            | Mybbp1a       | O35821           | 1.9                    | +                                            |                 |                      |                                                                              |
| Neuron navigator 1                                                | Nav1          | Q8CH77           | 1.6                    |                                              |                 |                      |                                                                              |
| Non-POU domain-containing octamer-binding protein                 | Nono          | Q5FVM4           | 1.7                    | +                                            |                 |                      |                                                                              |
| Protein unc-13 homolog A                                          | Unc13a        | Q62768           | 3.5                    | +                                            | +               |                      |                                                                              |
| Protein-L-isoaspartate(D-aspartate) O-methyltransferase           | Pcmt1         | P22062           | 2.5                    |                                              |                 |                      |                                                                              |
| Serine/arginine-rich splicing factor 2                            | Srsf2         | Q62093           | 2.4                    |                                              |                 | +                    |                                                                              |
| Serine/arginine-rich splicing factor 3                            | Srsf3         | P84104           | 1.6                    |                                              |                 |                      |                                                                              |
| SLIT-ROBO Rho GTPase-activating protein 2                         | Srgap2        | Q91Z67           | 2.5                    | +                                            |                 | +                    |                                                                              |
| <b>Sodium/potassium-transporting ATPase subunit alpha-3</b>       | <b>Atp1a3</b> | <b>P06687</b>    | <b>1.6</b>             | <b>+</b>                                     | <b>+</b>        |                      | <b>+ [18]</b>                                                                |
| Tubulin beta-4B chain                                             | Tubb4b        | P68372           | 1.6                    | +                                            | +               | +                    |                                                                              |
| Ubiquitin carboxyl-terminal hydrolase isozyme L1                  | Uchl1         | Q00981           | $\infty$               | +                                            | +               | +                    |                                                                              |
| Vesicle-associated membrane protein-associated protein A          | Vapa          | Q9WV55           | 4.0                    |                                              | +               | +                    |                                                                              |
| WD repeat-containing protein 47                                   | Wdr47         | Q8CGF6           | 2.8                    |                                              |                 |                      |                                                                              |

**Table 2**

**List of proteins from whole neurons lysates interacting with extracellularly applied fibrillar  $\alpha$ -syn**

Fold change corresponds to the average spectral count ratio between exposed cells and control cells of three independent replicates.  $\infty$ : the spectral count ratio is infinite as the protein is pulled-down only with fibrillar  $\alpha$ -synuclein.

Membrane and/or extracellular proteins are indicated as determined using the NCBI annotation tool of the Scaffold software based on Gene Ontology (GO) cell component term annotations. References describing extracellular exposure in peer-reviewed articles are indicated. **In bold**, the unique plasma membrane pulled-down both with oligomeric and fibrillar  $\alpha$ -synuclein, and presenting both transmembrane and extracellularly exposed regions.

| Protein name                                          | Gene name | Accession Number | Fold Change (Syn/Ctrl) | GO cell component term annotations from NCBI |                 |                      | Experimental description of extracellular exposure in peer-reviewed articles |
|-------------------------------------------------------|-----------|------------------|------------------------|----------------------------------------------|-----------------|----------------------|------------------------------------------------------------------------------|
|                                                       |           |                  |                        | Membrane                                     | Plasma membrane | Extracellular region |                                                                              |
| 14-3-3 protein gamma                                  | Ywhag     | P61982           | $\infty$               | +                                            | +               | +                    |                                                                              |
| 14-3-3 protein zeta/delta                             | Ywhaz     | P63102           | $\infty$               | +                                            | +               | +                    | + [19]                                                                       |
| 40S ribosomal protein S15                             | RPS15     | P62842           | $\infty$               |                                              |                 |                      |                                                                              |
| 40S ribosomal protein S16                             | Rps16     | P14131           | 3.0                    | +                                            | +               | +                    |                                                                              |
| 40S ribosomal protein S17                             | Rps17     | P04644           | 5.0                    |                                              |                 |                      |                                                                              |
| 40S ribosomal protein S18                             | Rps18     | P62270           | 6.7                    | +                                            | +               | +                    |                                                                              |
| 40S ribosomal protein S19                             | Rps19     | P17074           | $\infty$               |                                              |                 |                      |                                                                              |
| 40S ribosomal protein S20                             | Rps20     | P60867           | 1.6                    | +                                            |                 | +                    |                                                                              |
| 40S ribosomal protein S25                             | Rps25     | P62852           | 13.0                   |                                              |                 | +                    |                                                                              |
| 40S ribosomal protein S29                             | Rps29     | P62274           | 5.5                    | +                                            | +               | +                    |                                                                              |
| 40S ribosomal protein S5                              | Rps5      | P24050           | 9.0                    |                                              |                 |                      |                                                                              |
| 40S ribosomal protein S7                              | Rps7      | P62082           | 3.9                    | +                                            | +               | +                    |                                                                              |
| 5-azacytidine-induced protein 1                       | Azi1      | Q62036           | $\infty$               | +                                            |                 | +                    |                                                                              |
| 60S ribosomal protein L22-like 1                      | Rpl22l1   | Q9D7S7           | $\infty$               |                                              |                 |                      |                                                                              |
| 60S ribosomal protein L23                             | Rpl23     | P62830           | 3.1                    | +                                            | +               | +                    |                                                                              |
| 60S ribosomal protein L27                             | Rpl27     | P61354           | 2.1                    | +                                            | +               | +                    |                                                                              |
| 60S ribosomal protein L27a                            | Rpl27a    | P18445           | 2.2                    |                                              |                 |                      |                                                                              |
| 60S ribosomal protein L38                             | Rpl38     | P63174           | $\infty$               |                                              |                 |                      |                                                                              |
| Abl interactor 1                                      | Abi1      | Q8CBW3           | 18.0                   | +                                            | +               | +                    |                                                                              |
| Acetyl-CoA acetyltransferase, mitochondrial           | Acat1     | P17764           | $\infty$               | +                                            |                 | +                    |                                                                              |
| Actin filament-associated protein 1                   | Afap1     | Q8VH46           | 4.3                    |                                              |                 |                      |                                                                              |
| Adenomatous polyposis coli protein                    | Apc       | P70478           | $\infty$               | +                                            | +               |                      |                                                                              |
| Adenomatous polyposis coli protein 2                  | Apc2      | Q9Z1K7           | $\infty$               | +                                            | +               |                      |                                                                              |
| ADP/ATP translocase 2                                 | Slc25a5   | P51881           | 3.7                    | +                                            | +               | +                    |                                                                              |
| ADP-ribosylation factor GTPase-activating protein 3   | Arfgap3   | Q4KLN7           | $\infty$               | +                                            |                 |                      |                                                                              |
| Agtrin                                                | Agtrn     | P25304           | $\infty$               | +                                            | +               | +                    | + [20]                                                                       |
| Alpha-interneixin                                     | Ina       | P23565           | 34.0                   |                                              |                 |                      |                                                                              |
| Alpha-tubulin N-acetyltransferase                     | Atat1     | Q6MG11           | $\infty$               | +                                            | +               |                      |                                                                              |
| Amphiphysin                                           | Amph      | Q08838           | $\infty$               | +                                            | +               |                      |                                                                              |
| AP-3 complex subunit beta-2                           | Ap3b2     | Q9JME5           | $\infty$               | +                                            |                 |                      |                                                                              |
| AP-3 complex subunit delta-1                          | Ap3d1     | Q54774           | 4.3                    | +                                            |                 |                      |                                                                              |
| Apolipoprotein E                                      | ApoE      | P02650           | $\infty$               | +                                            | +               | +                    | + [21]                                                                       |
| Ataxin-2                                              | Atxn2     | Q70305           | $\infty$               | +                                            |                 |                      |                                                                              |
| Ataxin-2-like protein                                 | Atxn2l    | Q7TQH0           | $\infty$               | +                                            |                 |                      |                                                                              |
| ATP synthase subunit alpha, mitochondrial             | Atp5a1    | P15999           | 1.8                    | +                                            | +               |                      |                                                                              |
| ATP synthase subunit d, mitochondrial                 | Atp5h     | P31399           | $\infty$               | +                                            |                 |                      |                                                                              |
| ATP synthase subunit gamma, mitochondrial             | Atp5c1    | P35435           | 25.0                   | +                                            |                 |                      |                                                                              |
| ATP synthase subunit O, mitochondrial                 | Atp5o     | Q06647           | $\infty$               | +                                            |                 |                      |                                                                              |
| ATPase family AAA domain-containing protein 3         | Atad3     | Q3KRE0           | $\infty$               | +                                            |                 |                      |                                                                              |
| ATP-dependent RNA helicase DDX3X                      | Ddx3x     | Q62167           | 2.4                    | +                                            |                 | +                    |                                                                              |
| Bcl-2-associated transcription factor 1               | Bclaf1    | Q8K019           | 10.5                   |                                              |                 |                      |                                                                              |
| Calcium-binding mitochondrial carrier protein Aralar1 | Slc25a12  | Q8BH59           | $\infty$               | +                                            | +               |                      |                                                                              |
| Calmodulin-regulated spectrin-associated protein 2    | Camsap2   | Q8C1B1           | $\infty$               |                                              |                 |                      |                                                                              |
| Calmodulin-regulated spectrin-associated protein 3    | Camsap3   | Q80VC9           | $\infty$               | +                                            | +               |                      |                                                                              |
| CaM kinase-like vesicle-associated protein            | Camkv     | Q63092           | 6.0                    | +                                            | +               |                      |                                                                              |
| CAP-Gly domain-containing linker protein 2            | Clip2     | Q55156           | $\infty$               |                                              |                 |                      |                                                                              |
| Caskin-1                                              | Caskin1   | Q8VHK2           | $\infty$               |                                              |                 |                      |                                                                              |
| Catenin delta-2                                       | Ctndd2    | Q35927           | $\infty$               | +                                            | +               |                      | + [22]                                                                       |
| Cell division control protein 42 homolog              | Cdc42     | P60766           | $\infty$               | +                                            | +               | +                    |                                                                              |
| Centrosomal protein of 170 kDa                        | Cep170    | Q6A065           | 37.0                   | +                                            |                 |                      |                                                                              |
| Charged multivesicular body protein 2b                | Chmp2b    | Q8BJF9           | $\infty$               | +                                            |                 | +                    |                                                                              |
| Chromatin target of PRMT1 protein                     | Chtop     | Q9CY57           | 5.3                    |                                              |                 |                      |                                                                              |
| CLIP-associating protein 2                            | Clasp2    | Q991D4           | 1.7                    | +                                            | +               |                      |                                                                              |
| Coatomer subunit alpha                                | Copa      | Q8CIE6           | 3.0                    | +                                            |                 | +                    |                                                                              |

| Protein name                                                                | Gene name | Accession Number | Fold Change (Syn/Ctrl) | GO cell component term annotations from NCBI |                 |                      | Experimental description of extracellular exposure in peer-reviewed articles |
|-----------------------------------------------------------------------------|-----------|------------------|------------------------|----------------------------------------------|-----------------|----------------------|------------------------------------------------------------------------------|
|                                                                             |           |                  |                        | Membrane                                     | Plasma membrane | Extracellular region |                                                                              |
| Cofilin-1                                                                   | Cfl1      | P45592           | 3.8                    | +                                            | +               | +                    |                                                                              |
| Cytoplasmic dynein 1 heavy chain 1                                          | Dync1h1   | Q9JHU4           | 62.0                   | +                                            |                 | +                    |                                                                              |
| Dihydropyrimidinase-related protein 1                                       | Crmp1     | Q62950           | 4.5                    |                                              |                 |                      |                                                                              |
| Dihydropyrimidinase-related protein 2                                       | Dpysl2    | O08553           | 1.6                    | +                                            | +               | +                    |                                                                              |
| Disks large-associated protein 1                                            | Dlgap1    | Q9D415           | ∞                      | +                                            |                 | +                    |                                                                              |
| Disks large-associated protein 4                                            | Dlgap4    | P97839           | ∞                      | +                                            |                 | +                    |                                                                              |
| Dnaj homolog subfamily A member 1                                           | Dnaja1    | P63036           | ∞                      | +                                            |                 | +                    |                                                                              |
| Dnaj homolog subfamily B member 1                                           | Dnajb1    | Q9QYJ3           | ∞                      |                                              |                 | +                    |                                                                              |
| Dnaj homolog subfamily B member 2                                           | Dnajb2    | Q9QYI5           | ∞                      |                                              |                 |                      |                                                                              |
| Dnaj homolog subfamily B member 5                                           | Dnajb5    | O89114           | ∞                      |                                              |                 |                      |                                                                              |
| Dnaj homolog subfamily B member 6                                           | Dnajb6    | O54946           | ∞                      | +                                            |                 |                      |                                                                              |
| Dynactin subunit 1                                                          | Dctn1     | P28023           | 4.0                    |                                              |                 |                      |                                                                              |
| Elongation factor 1-alpha 1                                                 | Eef1a1    | P10126           | 2.6                    | +                                            | +               | +                    |                                                                              |
| Elongation factor Tu, mitochondrial                                         | Tufm      | P85834           | 27.5                   | +                                            |                 | +                    |                                                                              |
| Ena/VASP-like protein                                                       | Evl       | O08719           | ∞                      | +                                            | +               |                      |                                                                              |
| Eukaryotic translation initiation factor 3 subunit C                        | Eif3c     | B5DFC8           | ∞                      |                                              |                 |                      |                                                                              |
| Glyceraldehyde-3-phosphate dehydrogenase                                    | Gapdh     | P04797           | 2.6                    |                                              |                 |                      | + [23]                                                                       |
| Glypican-1                                                                  | Gpc1      | P35053           | ∞                      | +                                            | +               | +                    | + [24]                                                                       |
| Glypican-2                                                                  | Gpc2      | P51653           | ∞                      | +                                            | +               | +                    | + [24]                                                                       |
| Glypican-4                                                                  | Gpc4      | P51655           | ∞                      | +                                            | +               | +                    | + [24]                                                                       |
| Guanine nucleotide-binding protein G(I)/G(S)/G(T) subunit beta-1            | Gnb1      | P54311           | ∞                      | +                                            | +               | +                    |                                                                              |
| Heat shock cognate 71 kDa protein                                           | HSPA8     | P63018           | 5.0                    | +                                            | +               |                      | + [16]                                                                       |
| Hepatoma-derived growth factor-related protein 2                            | Hdgfrp2   | Q925G1           | ∞                      |                                              |                 |                      |                                                                              |
| Heterochromatin protein 1-binding protein 3                                 | Hp1bp3    | Q6P747           | 6.0                    |                                              |                 |                      |                                                                              |
| Heterogeneous nuclear ribonucleoprotein D0                                  | Hnrnpd    | Q60668           | ∞                      |                                              |                 | +                    |                                                                              |
| Heterogeneous nuclear ribonucleoprotein D-like                              | Hnrpdl    | Q9Z130           | ∞                      |                                              |                 | +                    |                                                                              |
| Heterogeneous nuclear ribonucleoprotein K                                   | Hnrnpk    | P61979           | 4.5                    | +                                            | +               | +                    |                                                                              |
| Heterogeneous nuclear ribonucleoprotein M                                   | Hnrnpm    | Q62826           | 5.4                    |                                              |                 |                      |                                                                              |
| Heterogeneous nuclear ribonucleoprotein U-like protein 2                    | Hnrnpul2  | Q00PI9           | 2.7                    | +                                            |                 |                      |                                                                              |
| Histone H2A.J                                                               | H2afj     | A9UMV8           | 1.7                    |                                              |                 |                      |                                                                              |
| Histone H2A.Z                                                               | H2afz     | P0C0S6           | 6.0                    |                                              |                 | +                    |                                                                              |
| Histone H4                                                                  | Hist1h4b  | P62804           | 1.6                    | +                                            |                 | +                    |                                                                              |
| Host cell factor 1                                                          | Hcfc1     | Q61191           | ∞                      | +                                            |                 |                      |                                                                              |
| IQ motif and SEC7 domain-containing protein 1                               | Iqsec1    | Q8R0S2           | ∞                      | +                                            |                 | +                    |                                                                              |
| Kelch-like protein 22                                                       | Klhl22    | D3Z2C3           | ∞                      |                                              |                 |                      |                                                                              |
| KH domain-containing, RNA-binding, signal transduction-associated protein 1 | Khdrbs1   | Q91V33           | ∞                      | +                                            |                 |                      |                                                                              |
| Kinesin heavy chain isoform 5C                                              | Kif5c     | P28738           | 26.5                   |                                              |                 |                      |                                                                              |
| Lamin-B1                                                                    | LmnB1     | P70615           | ∞                      | +                                            |                 |                      |                                                                              |
| Lipid phosphate phosphatase-related protein type 4                          | Lppr4     | Q7TME0           | ∞                      | +                                            |                 | +                    |                                                                              |
| Liprin-alpha-2                                                              | Ppfla2    | Q8BSS9           | 6.0                    |                                              |                 | +                    | + [25]                                                                       |
| MAP/microtubule affinity-regulating kinase 3                                | Mark3     | Q8VHF0           | 11.0                   | +                                            | +               |                      |                                                                              |
| MAP/microtubule affinity-regulating kinase 4                                | Mark4     | Q8CIP4           | ∞                      |                                              |                 |                      |                                                                              |
| MAP7 domain-containing protein 1                                            | Map7d1    | A2AJI0           | ∞                      |                                              |                 |                      |                                                                              |
| Microtubule-associated protein 1B                                           | Map1b     | P14873           | 2.7                    | +                                            | +               |                      |                                                                              |
| Microtubule-associated protein 1S                                           | Map1s     | P0C5W1           | ∞                      | +                                            | +               |                      |                                                                              |
| Microtubule-associated protein 2                                            | Map2      | P15146           | 5.9                    |                                              |                 |                      |                                                                              |
| Microtubule-associated protein 4                                            | Map4      | Q5M7W5           | 3.5                    | +                                            |                 | +                    |                                                                              |
| Microtubule-associated protein 6                                            | Map6      | Q63560           | 3.0                    |                                              |                 |                      |                                                                              |
| Microtubule-associated protein tau                                          | Mapt      | P19332           | 5.4                    | +                                            | +               |                      | + [26]                                                                       |
| Microtubule-associated serine/threonine-protein kinase 1                    | Mast1     | Q810W7           | ∞                      | +                                            | +               |                      |                                                                              |
| Mitochondrial glutamate carrier 1                                           | Slc25a22  | Q9D6M3           | ∞                      | +                                            |                 |                      |                                                                              |
| Mitogen-activated protein kinase kinase kinase 4                            | Map4k4    | P97820           | ∞                      |                                              |                 |                      |                                                                              |
| Myc box-dependent-interacting protein 1                                     | Bin1      | O08539           | ∞                      | +                                            | +               |                      |                                                                              |
| Myosin regulatory light chain 12B                                           | Myl12b    | P18666           | ∞                      |                                              |                 |                      |                                                                              |
| Nck-associated protein 1                                                    | Nckap1    | P28660           | 4.0                    | +                                            | +               | +                    |                                                                              |
| Neurexin-1-alpha                                                            | Nrxn1     | Q63372           | ∞                      | +                                            | +               |                      | + [27]                                                                       |
| Neurexin-2-alpha                                                            | Nrxn2     | Q63374           | ∞                      | +                                            | +               |                      | + [28]                                                                       |
| Neurofilament light polypeptide                                             | Nefl      | P19527           | ∞                      |                                              |                 |                      |                                                                              |
| Neurofilament medium polypeptide                                            | Nefm      | P12839           | ∞                      |                                              |                 |                      |                                                                              |
| Neuromodulin                                                                | Gap43     | P07936           | 4.0                    | +                                            | +               |                      |                                                                              |
| Neuron navigator 1                                                          | Nav1      | Q8CH77           | 44.3                   |                                              |                 |                      |                                                                              |

| Protein name                                                | Gene name     | Accession Number | Fold Change (Syn/Ctrl) | GO cell component term annotations from NCBI |                 |                      | Experimental description of extracellular exposure in peer-reviewed articles |
|-------------------------------------------------------------|---------------|------------------|------------------------|----------------------------------------------|-----------------|----------------------|------------------------------------------------------------------------------|
|                                                             |               |                  |                        | Membrane                                     | Plasma membrane | Extracellular region |                                                                              |
| Neuron navigator 3                                          | Nav3          | Q80TN7           | ∞                      | +                                            |                 |                      |                                                                              |
| Neuronal migration protein doublecortin                     | Dcx           | O88809           | 4.2                    |                                              |                 |                      |                                                                              |
| Nucleolar and coiled-body phosphoprotein 1                  | Nolc1         | P41777           | ∞                      |                                              |                 |                      |                                                                              |
| Pinin                                                       | Pnn           | O35691           | ∞                      | +                                            | +               |                      |                                                                              |
| Polymerase delta-interacting protein 3                      | Poldip3       | Q88G81           | ∞                      |                                              |                 |                      |                                                                              |
| Prelamin-A/C                                                | Lmna          | P48679           | ∞                      | +                                            |                 |                      |                                                                              |
| Prickle-like protein 2                                      | Prickle2      | Q80Y24           | ∞                      | +                                            | +               |                      |                                                                              |
| Prohibitin-2                                                | Phb2          | O35129           | ∞                      | +                                            |                 | +                    |                                                                              |
| Protein bassoon                                             | Bsn           | O88778           | 11.0                   | +                                            | +               |                      |                                                                              |
| Protein FAM54B                                              | Fam54b        | Q5XII9           | ∞                      |                                              |                 |                      |                                                                              |
| Protein Hook homolog 3                                      | Hook3         | Q8BUK6           | ∞                      | +                                            |                 |                      |                                                                              |
| Protein KIAA0284                                            | Kiaa0284      | Q80U49           | ∞                      |                                              |                 |                      |                                                                              |
| Protein NipSnap homolog 1                                   | Nipsnap1      | O55125           | ∞                      | +                                            |                 |                      |                                                                              |
| Protein piccolo                                             | Pclo          | Q9JKS6           | ∞                      | +                                            | +               |                      |                                                                              |
| Protein RUFY3                                               | Rufy3         | Q5FVJ0           | ∞                      |                                              | no information  |                      |                                                                              |
| Protein TANC2                                               | Tanc2         | A2A690           | ∞                      |                                              | no information  |                      |                                                                              |
| Rabphilin-3A                                                | Rph3a         | P47709           | ∞                      | +                                            | +               |                      |                                                                              |
| Ras GTPase-activating protein SynGAP                        | Syngap1       | Q9QUH6           | ∞                      | +                                            | +               |                      |                                                                              |
| Ras-related C3 botulinum toxin substrate 1                  | Rac1          | P63001           | ∞                      | +                                            | +               | +                    |                                                                              |
| Ras-related protein M-Ras                                   | Mras          | O08989           | ∞                      | +                                            | +               | +                    |                                                                              |
| Ras-related protein Rab-8A                                  | Rab8a         | P35280           | ∞                      | +                                            | +               | +                    |                                                                              |
| Ras-related protein Ral-A                                   | Rala          | P63322           | ∞                      | +                                            | +               | +                    |                                                                              |
| Ras-related protein Rap-1A                                  | Rap1a         | P62835           | ∞                      | +                                            | +               | +                    |                                                                              |
| Regulating synaptic membrane exocytosis protein 1           | Rims1         | Q9JIR4           | 1.6                    | +                                            | +               |                      |                                                                              |
| Rho GTPase-activating protein 33                            | Arhgap33      | Q80YF9           | ∞                      | +                                            | +               |                      |                                                                              |
| Ribosome-binding protein 1                                  | Rrbp1         | Q99PL5           | 10.0                   | +                                            |                 |                      |                                                                              |
| SAFB-like transcription modulator                           | Sltm          | Q8CH25           | ∞                      |                                              |                 |                      |                                                                              |
| Septin-7                                                    | Sept7         | O55131           | ∞                      | +                                            | +               | +                    |                                                                              |
| Serine/arginine repetitive matrix protein 2                 | Srrm2         | Q8BTI8           | ∞                      |                                              |                 |                      |                                                                              |
| Serine/arginine-rich splicing factor 7                      | Srsf7         | Q8BL97           | 1.8                    |                                              |                 | +                    |                                                                              |
| Serine/threonine-protein kinase DCLK1                       | Dclk1         | Q9JLM8           | 2.9                    |                                              | no information  |                      |                                                                              |
| Serine/threonine-protein kinase DCLK2                       | Dclk2         | Q5MPA9           | 65.0                   |                                              |                 |                      |                                                                              |
| Serine/threonine-protein kinase MARK1                       | Mark1         | O08678           | 8.0                    | +                                            | +               |                      |                                                                              |
| Serine/threonine-protein kinase MARK2                       | Mark2         | O08679           | 11.0                   | +                                            | +               |                      |                                                                              |
| Signal recognition particle 54 kDa protein                  | Srp54         | Q6AYB5           | ∞                      |                                              |                 |                      |                                                                              |
| <b>Sodium/potassium-transporting ATPase subunit alpha-3</b> | <b>Atp1a3</b> | <b>P06687</b>    | <b>6.0</b>             | <b>+</b>                                     | <b>+</b>        |                      | <b>+ [18]</b>                                                                |
| Sodium/potassium-transporting ATPase subunit beta-1         | Atp1b1        | P07340           | 2.5                    | +                                            | +               | +                    | <b>+ [18]</b>                                                                |
| SRC kinase signaling inhibitor 1                            | Srcin1        | Q9QXY2           | 3.2                    | +                                            | +               |                      |                                                                              |
| Stress-70 protein, mitochondrial                            | HSPA9         | O35501           | ∞                      |                                              |                 |                      | <b>+ [16]</b>                                                                |
| Synapsin-1                                                  | Syn1          | P09951           | 29.7                   | +                                            | +               |                      |                                                                              |
| Synapsin-2                                                  | Syn2          | Q63537           | ∞                      | +                                            | +               |                      |                                                                              |
| Synaptosomal-associated protein 47                          | Snap47        | Q6P6S0           | ∞                      | +                                            | +               |                      |                                                                              |
| TBC1 domain family member 10B                               | Tbc1d10b      | Q8BHL3           | ∞                      | +                                            | +               |                      |                                                                              |
| T-complex protein 1 subunit alpha                           | Tcp1          | P11983           | ∞                      | +                                            | +               | +                    |                                                                              |
| T-complex protein 1 subunit beta                            | Cct2          | P80314           | ∞                      | +                                            | +               | +                    |                                                                              |
| T-complex protein 1 subunit delta                           | Cct4          | P80315           | ∞                      |                                              |                 | +                    |                                                                              |
| T-complex protein 1 subunit gamma                           | Cct3          | P80318           | ∞                      | +                                            | +               | +                    |                                                                              |
| T-complex protein 1 subunit zeta                            | Cct6a         | P80317           | ∞                      |                                              |                 | +                    |                                                                              |
| Testican-1                                                  | Spock1        | Q62288           | ∞                      |                                              |                 | +                    | <b>+ [29]</b>                                                                |
| Thyroid hormone receptor-associated protein 3               | Thrap3        | Q5M7V8           | ∞                      |                                              |                 |                      |                                                                              |
| Tomoregulin-1                                               | Tmeff1        | Q9QYV1           | ∞                      | +                                            | +               |                      | <b>+ [30]</b>                                                                |
| Traf2 and NCK-interacting protein kinase                    | Tnik          | P83510           | ∞                      | +                                            | +               | +                    |                                                                              |
| Transformer-2 protein homolog beta                          | Tra2b         | P62996           | ∞                      |                                              |                 |                      |                                                                              |
| Transforming protein RhoA                                   | Rhoa          | P61589           | ∞                      | +                                            | +               |                      |                                                                              |
| Trifunctional enzyme subunit alpha, mitochondrial           | Hadha         | Q64428           | ∞                      | +                                            |                 |                      |                                                                              |
| Tropomyosin alpha-3 chain                                   | Tpm3          | Q63610           | ∞                      |                                              |                 |                      |                                                                              |
| Uncharacterized protein KIAA1107                            | Kiaa1107      | Q80TK0           | ∞                      |                                              | no information  |                      |                                                                              |
| Vesicle-associated membrane protein-associated protein A    | Vapa          | Q9WV55           | ∞                      | +                                            | +               |                      |                                                                              |
| Vimentin                                                    | Vim           | P31000           | 32.5                   |                                              |                 |                      |                                                                              |
| Voltage-dependent anion-selective channel protein 1         | Vdac1         | Q60932           | 5.0                    | +                                            | +               | +                    | <b>+ [31]</b>                                                                |
| WD repeat-containing protein 37                             | Wdr37         | Q8CBE3           | ∞                      |                                              | no information  |                      |                                                                              |
| Zinc finger CCCH domain-containing protein 18               | Zc3h18        | Q6TQE1           | ∞                      |                                              |                 |                      |                                                                              |
| ZW10 interactor                                             | Zwint         | Q8VIL3           | ∞                      |                                              |                 |                      |                                                                              |

**Table 3****List of proteins from whole astrocytes lysates interacting with extracellularly applied oligomeric  $\alpha$ -syn**

Fold change corresponds to the average spectral count ratio between exposed cells and control cells of three independent replicates.  $\infty$ : the spectral count ratio is infinite as the protein is pulled-down only with fibrillar  $\alpha$ -synuclein. Membrane and/or extracellular proteins are indicated as determined using the NCBI annotation tool of the Scaffold software based on Gene Ontology (GO) cell component term annotations. References describing extracellular exposure in peer-reviewed articles are indicated.

| Protein name                                       | Gene name | Accession Number | Fold Change (Syn/Ctrl) | GO cell component term annotations from NCBI |                 |                      | Experimental description of extracellular exposure in peer-reviewed articles |
|----------------------------------------------------|-----------|------------------|------------------------|----------------------------------------------|-----------------|----------------------|------------------------------------------------------------------------------|
|                                                    |           |                  |                        | Membrane                                     | Plasma membrane | Extracellular region |                                                                              |
| 14-3-3 protein epsilon                             | Ywhae     | P62260           | 2.7                    | +                                            | +               | +                    |                                                                              |
| 40S ribosomal protein S9                           | Rps9      | P29314           | 1.8                    |                                              |                 |                      |                                                                              |
| 60S ribosomal protein L13a                         | Rpl13a    | P35427           | 1.7                    | +                                            | +               |                      |                                                                              |
| 60S ribosomal protein L26                          | Rpl26     | P61255           | 2.7                    |                                              |                 |                      |                                                                              |
| 60S ribosomal protein L7a                          | Rpl7a     | P62425           | 2.2                    | +                                            | +               | +                    |                                                                              |
| 78 kDa glucose-regulated protein                   | Hspa5     | P06761           | 4.4                    | +                                            | +               | +                    | + [16,17]                                                                    |
| Alpha-enolase                                      | Eno1      | P04764           | 1.7                    |                                              |                 |                      |                                                                              |
| Arginyl-tRNA synthetase, cytoplasmic               | Rars      | P40329           | $\infty$               | +                                            |                 | +                    |                                                                              |
| Aspartyl-tRNA synthetase, cytoplasmic              | Dars      | P15178           | 1.9                    | +                                            |                 | +                    |                                                                              |
| Bifunctional aminoacyl-tRNA synthetase             | Eprs      | Q8CGC7           | 1.6                    | +                                            |                 |                      |                                                                              |
| Dextrin                                            | Dstn      | Q7M0E3           | 7.0                    |                                              |                 |                      |                                                                              |
| Elongation factor 1-delta                          | Eef1d     | Q68FR9           | 2.0                    |                                              |                 |                      |                                                                              |
| FH1/FH2 domain-containing protein 1                | Fhod1     | Q6P9Q4           | 3.0                    | +                                            |                 |                      |                                                                              |
| Low-density lipoprotein receptor-related protein 2 | Lrp2      | P98158           | 6.5                    | +                                            | +               | +                    |                                                                              |
| Lysyl-tRNA synthetase                              | Kars      | Q99MN1           | 2.2                    |                                              |                 |                      |                                                                              |
| Major vault protein                                | Mvp       | Q62667           | 7.0                    |                                              |                 | +                    |                                                                              |
| NHP2-like protein 1                                | Nhp2l1    | P55770           | 3.0                    |                                              |                 |                      |                                                                              |
| Polyadenylate-binding protein 1                    | Pabpc1    | Q9EPH8           | 4.5                    | +                                            | +               | +                    |                                                                              |
| Protein kinase C delta-binding protein             | Prkcdbp   | Q9Z1H9           | 2.0                    | +                                            | +               |                      |                                                                              |
| Protein lin-7 homolog C                            | Lin7c     | Q792I0           | 1.6                    | +                                            | +               | +                    |                                                                              |
| Putative ATP-dependent RNA helicase DHX30          | Dhx30     | Q5BJS0           | 2.3                    |                                              |                 |                      |                                                                              |
| Septin-2                                           | Septin2   | Q91Y81           | 1.7                    | +                                            | +               | +                    |                                                                              |
| SPATS2-like protein                                | Spats2l   | Q5U2T3           | 2.2                    |                                              |                 |                      |                                                                              |
| Stress-70 protein, mitochondrial                   | Hspa9     | P48721           | 2.5                    |                                              |                 |                      | + [16]                                                                       |
| Tricarboxylate transport protein, mitochondrial    | Slc25a1   | P32089           | 2.0                    | +                                            |                 |                      |                                                                              |

**Table 4****List of proteins from whole astrocytes lysates interacting with extracellularly applied fibrillar  $\alpha$ -syn**

Fold change corresponds to the average spectral count ratio between exposed cells and control cells of three independent replicates.  $\infty$ : the spectral count ratio is infinite as the protein is pulled-down only with fibrillar  $\alpha$ -synuclein. Membrane and/or extracellular proteins are indicated as determined using the NCBI annotation tool of the Scaffold software based on Gene Ontology (GO) cell component term annotations. References describing extracellular exposure in peer-reviewed articles are indicated.

| Protein name                                             | Gene name | Accession Number | Fold Change (Syn/Ctrl) | GO cell component term annotations from NCBI |                 |                      | Experimental description of extracellular exposure in peer-reviewed articles |
|----------------------------------------------------------|-----------|------------------|------------------------|----------------------------------------------|-----------------|----------------------|------------------------------------------------------------------------------|
|                                                          |           |                  |                        | Membrane                                     | Plasma membrane | Extracellular region |                                                                              |
| 2',3'-cyclic-nucleotide 3'-phosphodiesterase             | Cnp       | P13233           | $\infty$               | +                                            | +               | +                    |                                                                              |
| 40S ribosomal protein S15                                | RPS15     | P62842           | $\infty$               |                                              |                 |                      |                                                                              |
| 40S ribosomal protein S16                                | Rps16     | P14131           | 2.2                    | +                                            | +               | +                    |                                                                              |
| 40S ribosomal protein S17                                | Rps17     | P04644           | 8.0                    |                                              |                 |                      |                                                                              |
| 40S ribosomal protein S18                                | Rps18     | P62270           | 6.2                    | +                                            | +               | +                    |                                                                              |
| 40S ribosomal protein S25                                | Rps25     | P62852           | 4.5                    |                                              |                 | +                    |                                                                              |
| 40S ribosomal protein S29                                | Rps29     | P62274           | 3.0                    | +                                            | +               | +                    |                                                                              |
| 40S ribosomal protein S7                                 | Rps7      | P62082           | 2.0                    | +                                            | +               | +                    |                                                                              |
| 60S ribosomal protein L22-like 1                         | Rpl22l1   | Q9D757           | $\infty$               |                                              |                 |                      |                                                                              |
| 60S ribosomal protein L24                                | Rpl24     | P83732           | 1.8                    | +                                            |                 | +                    |                                                                              |
| 60S ribosomal protein L38                                | Rpl38     | P63174           | $\infty$               |                                              |                 |                      |                                                                              |
| 78 KDa Glucose-regulated protein                         | Hspa5     | P06761           | 34.0                   | +                                            | +               | +                    | + [16,17]                                                                    |
| Actin, cytoplasmic                                       | Actb      | P60711           | $\infty$               | +                                            | +               | +                    |                                                                              |
| ADP/ATP translocase 2                                    | Slc25a5   | P51881           | 2.3                    | +                                            | +               | +                    |                                                                              |
| ADP-ribosylation factor GTPase-activating protein 2      | Arfgap2   | Q3MID3           | $\infty$               | +                                            | +               |                      |                                                                              |
| ADP-ribosylation factor GTPase-activating protein 3      | Arfgap3   | Q4KLN7           | $\infty$               | +                                            |                 |                      |                                                                              |
| Alpha-actinin-1                                          | Actn1     | Q9Z1P2           | $\infty$               | +                                            | +               | +                    |                                                                              |
| Alpha-crystallin B chain                                 | CRYAB     | P05811           | $\infty$               |                                              |                 |                      |                                                                              |
| Annexin A1                                               | Anxa1     | P07150           | 2.0                    | +                                            | +               | +                    |                                                                              |
| AP-2 complex subunit mu                                  | Ap2m1     | P84091           | 2.5                    | +                                            | +               | +                    |                                                                              |
| Apolipoprotein E                                         | ApoE      | P02650           | $\infty$               |                                              | +               | +                    | + [21]                                                                       |
| Ataxin-2                                                 | Atxn2     | O70305           | $\infty$               | +                                            |                 |                      |                                                                              |
| ATP synthase subunit gamma, mitochondrial                | Atp5c1    | P35435           | 15.0                   | +                                            |                 |                      |                                                                              |
| ATP synthase subunit O, mitochondrial                    | Atp5o     | Q06647           | $\infty$               | +                                            |                 |                      |                                                                              |
| ATP-dependent RNA helicase DDX3X                         | Ddx3x     | Q62167           | 2.9                    | +                                            |                 | +                    |                                                                              |
| Band 4.1-like protein 5                                  | Epb41l5   | Q5FVG2           | $\infty$               | +                                            | +               |                      |                                                                              |
| Calmodulin                                               | Calm1     | P62161           | 2.5                    | +                                            | +               | +                    |                                                                              |
| Calmodulin-regulated spectrin-associated protein 2       | Camsap2   | Q8C1B1           | $\infty$               |                                              |                 |                      |                                                                              |
| Calponin-1                                               | Cnn1      | Q08091           | $\infty$               | +                                            | +               |                      |                                                                              |
| Cdc42 effector protein 1                                 | Cdc42ep1  | A1A5P0           | $\infty$               | +                                            | +               |                      |                                                                              |
| Cell division control protein 42 homolog                 | Cdc42     | P60766           | $\infty$               | +                                            | +               | +                    |                                                                              |
| Charged multivesicular body protein 2b                   | Chmp2b    | Q8BJF9           | $\infty$               | +                                            |                 | +                    |                                                                              |
| Chordin-like protein 1                                   | Chrdl1    | Q76LDO           | 9.0                    |                                              |                 | +                    |                                                                              |
| CLIP-associating protein 2                               | Clasp2    | Q99JD4           | 16.0                   | +                                            | +               |                      |                                                                              |
| Cofilin-1                                                | Cfl1      | P45592           | 2.0                    | +                                            | +               | +                    |                                                                              |
| Cytoplasmic dynein 1 heavy chain 1                       | Dync1h1   | Q9JHU4           | 1.6                    | +                                            |                 | +                    |                                                                              |
| Dnaj homolog subfamily A member 1                        | Dnaja1    | P63036           | $\infty$               | +                                            |                 | +                    |                                                                              |
| Dnaj homolog subfamily A member 2                        | Dnaja2    | Q9QYJ0           | $\infty$               | +                                            |                 | +                    |                                                                              |
| Dnaj homolog subfamily B member 1                        | Dnajb1    | Q9QYJ3           | $\infty$               |                                              |                 | +                    |                                                                              |
| Dnaj homolog subfamily B member 6                        | Dnajb6    | O54946           | $\infty$               | +                                            |                 |                      |                                                                              |
| Elongation factor 1-alpha 1                              | Eef1a1    | P10126           | 2.0                    | +                                            | +               | +                    |                                                                              |
| Elongation factor Tu, mitochondrial                      | Tufm      | P85834           | 5.0                    | +                                            |                 | +                    |                                                                              |
| Filamin-A                                                | Flna      | Q88TM8           | 1.8                    | +                                            | +               | +                    |                                                                              |
| Friend of PRMT1 protein                                  | Fop       | Q9CY57           | 5.0                    |                                              |                 |                      |                                                                              |
| G kinase-anchoring protein 1                             | Gkap1     | Q5XIG5           | 3.0                    |                                              |                 |                      |                                                                              |
| Glial fibrillary acidic protein                          | Gfap      | P47819           | 3.2                    | +                                            |                 |                      |                                                                              |
| Glutathione peroxidase 1                                 | Gpx1      | P04041           | 2.0                    |                                              |                 | +                    |                                                                              |
| Glypican-4                                               | Gpc4      | P51655           | $\infty$               | +                                            | +               | +                    | + [24]                                                                       |
| Golgi-associated plant pathogenesis-related protein 1    | Glpr2     | Q9CYL5           | 7.0                    | +                                            |                 | +                    |                                                                              |
| Heat shock cognate 71 kDa protein                        | HSPA8     | P63018           | 3.4                    | +                                            | +               |                      | + [16]                                                                       |
| Heterogeneous nuclear ribonucleoprotein A1               | Hnrnpa1   | P04256           | $\infty$               |                                              |                 |                      |                                                                              |
| Heterogeneous nuclear ribonucleoprotein D0               | Hnrnpd    | Q60668           | $\infty$               |                                              |                 | +                    |                                                                              |
| Heterogeneous nuclear ribonucleoprotein G retrogene-like | Rbmxml    | P84586           | 1.6                    |                                              |                 | +                    |                                                                              |
| Heterogeneous nuclear ribonucleoprotein U-like protein 2 | Hnrnpul2  | Q00PI9           | 25.0                   | +                                            |                 |                      |                                                                              |
| Heterogeneous nuclear ribonucleoproteins A2/B1           | Hnrnpa2b1 | A7VJC2           | $\infty$               |                                              |                 |                      |                                                                              |

| Protein name                                                   | Gene name | Accession Number | Fold Change (Syn/Ctrl) | GO cell component term annotations from NCBI |                 |                      | Experimental description of extracellular exposure in peer-reviewed articles |
|----------------------------------------------------------------|-----------|------------------|------------------------|----------------------------------------------|-----------------|----------------------|------------------------------------------------------------------------------|
|                                                                |           |                  |                        | Membrane                                     | Plasma membrane | Extracellular region |                                                                              |
| Histone H3.3                                                   | H3f3b     | P84245           | 2.2                    | no information                               |                 |                      |                                                                              |
| Histone H1.2                                                   | Hist1h1c  | P15864           | ∞                      |                                              |                 |                      |                                                                              |
| Histone H2A.Z                                                  | H2afz     | P0C0S6           | ∞                      |                                              |                 | +                    |                                                                              |
| IQ motif and SEC7 domain-containing protein 1                  | lqsec1    | Q8R0S2           | ∞                      | +                                            | +               |                      |                                                                              |
| associated protein 1                                           | Khdrbs1   | Q60749           | ∞                      | +                                            |                 |                      |                                                                              |
| Kinesin-1 heavy chain                                          | Kif5b     | Q2PQA9           | ∞                      | +                                            |                 |                      |                                                                              |
| Lamin-B1                                                       | Lmnb1     | P70615           | ∞                      | +                                            |                 |                      |                                                                              |
| Long-chain fatty acid transport protein 1                      | Slc27a1   | P97849           | 1.6                    | no information                               |                 |                      |                                                                              |
| MAP7 domain-containing protein 1                               | Map7d1    | A2AJI0           | ∞                      |                                              |                 |                      |                                                                              |
| Microtubule-associated protein 2                               | Map2      | P15146           | 5.4                    |                                              |                 |                      |                                                                              |
| Microtubule-associated protein 4                               | Map4      | Q5M7W5           | 3.9                    | +                                            | +               | +                    |                                                                              |
| Microtubule-associated protein 6                               | Map6      | Q63560           | ∞                      |                                              |                 |                      |                                                                              |
| Mitochondrial import inner membrane translocase subunit TIM44  | Timm44    | O35094           | ∞                      | +                                            |                 |                      |                                                                              |
| Multifunctional protein ADE2                                   | Paics     | P51583           | 3.0                    | no information                               |                 |                      |                                                                              |
| Myosin regulatory light chain 12B                              | Myl12b    | P18666           | 3.8                    |                                              |                 |                      |                                                                              |
| Myosin-10                                                      | Myh10     | Q61879           | 1.6                    |                                              |                 | +                    |                                                                              |
| Nestin                                                         | Nes       | P21263           | ∞                      |                                              |                 |                      |                                                                              |
| Non-muscle caldesmon                                           | Cald1     | Q62736           | 4.4                    |                                              |                 |                      |                                                                              |
| Nuclear pore complex protein Nup214                            | Nup214    | Q80U93           | ∞                      | +                                            | +               |                      |                                                                              |
| Nuclear pore complex protein Nup98-Nup96                       | Nup98     | P49793           | ∞                      | +                                            |                 |                      |                                                                              |
| PDZ and LIM domain protein 5                                   | Pdlim5    | Q62920           | 19.0                   | +                                            | +               |                      |                                                                              |
| PDZ and LIM domain protein 7                                   | Pdlim7    | Q3TJD7           | 6.0                    | +                                            | +               |                      |                                                                              |
| Pinin                                                          | Pnn       | O35691           | ∞                      | +                                            | +               |                      |                                                                              |
| Pleckstrin homology-like domain family B member 1              | Phldb1    | Q6PDH0           | 34.0                   | no information                               |                 |                      |                                                                              |
| Plectin                                                        | Plec      | P30427           | 4.8                    | +                                            | +               |                      |                                                                              |
| Pre-B-cell leukemia transcription factor-interacting protein 1 | Pbxip1    | A2VD12           | 1.8                    |                                              |                 |                      |                                                                              |
| Prelamin-A/C                                                   | Lmna      | P48679           | 3.3                    | +                                            |                 |                      |                                                                              |
| Protein FAM164A                                                | Fam164a   | Q8BJH1           | 3.0                    | no information                               |                 |                      |                                                                              |
| Protein lin-7 homolog C                                        | Lin7c     | O88952           | 1.7                    | +                                            | +               | +                    |                                                                              |
| Ras-related C3 botulinum toxin substrate 1                     | Rac1      | P63001           | ∞                      | +                                            | +               | +                    |                                                                              |
| Ras-related protein Rab-13                                     | Rab13     | P35286           | ∞                      | +                                            | +               | +                    |                                                                              |
| Ras-related protein Rab-8A                                     | Rab8a     | P35280           | ∞                      | +                                            | +               | +                    |                                                                              |
| Ras-related protein Rab-8B                                     | Rab8b     | P61028           | ∞                      | +                                            | +               | +                    |                                                                              |
| Ras-related protein Ral-A                                      | Rala      | P63321           | ∞                      | +                                            | +               | +                    |                                                                              |
| Ras-related protein Rap-1A                                     | Rap1a     | P62835           | ∞                      | +                                            | +               | +                    |                                                                              |
| Rho-related GTP-binding protein RhoG                           | Rhog      | P84096           | ∞                      | +                                            | +               | +                    |                                                                              |
| Ribosome biogenesis regulatory protein homolog                 | Rrs1      | A1A5P2           | 3.0                    |                                              |                 |                      |                                                                              |
| Septin-7                                                       | Sept7     | O55131           | 1.8                    | +                                            | +               | +                    |                                                                              |
| Serine/arginine repetitive matrix protein 2                    | Srrm2     | Q8BT18           | ∞                      |                                              |                 |                      |                                                                              |
| Serine/threonine-protein kinase DCLK1                          | Dclk1     | Q9JLM8           | 32.0                   | no information                               |                 |                      |                                                                              |
| Serine/threonine-protein phosphatase PGAM5, mitochondrial      | Pgam5     | Q562B5           | 7.0                    | +                                            |                 |                      |                                                                              |
| Serpin H1 (Heat shock protein 47)                              | Serpinh1  | P19324           | 6.7                    |                                              |                 | +                    |                                                                              |
| Signal recognition particle 54 kDa protein                     | Srp54     | P14576           | ∞                      |                                              |                 |                      |                                                                              |
| Sorbin and SH3 domain-containing protein 2                     | Sorbs2    | O35413           | ∞                      |                                              |                 |                      |                                                                              |
| Stress-70 protein, mitochondrial                               | HSPA9     | O35501           | 3.3                    |                                              |                 |                      | + [16]                                                                       |
| Sulfide:quinone oxidoreductase, mitochondrial                  | Sqrdl     | Q9R112           | 5.5                    | +                                            |                 |                      |                                                                              |
| Trifunctional enzyme subunit alpha, mitochondrial              | Hadha     | Q64428           | 4.7                    | +                                            |                 |                      |                                                                              |
| Trifunctional enzyme subunit beta, mitochondrial               | Hadhb     | Q60587           | 3.0                    | +                                            |                 | +                    |                                                                              |
| Vesicle-associated membrane protein-associated protein A       | Vapa      | Q9WV55           | 4.0                    | +                                            | +               |                      |                                                                              |
| Vimentin                                                       | Vim       | P31000           | 2.4                    |                                              |                 |                      |                                                                              |
| Vinexin                                                        | Sorbs3    | Q9R1Z8           | ∞                      | +                                            | +               |                      |                                                                              |
| Voltage-dependent anion-selective channel protein 1            | Vdac1     | Q60932           | ∞                      | +                                            | +               | +                    | + [31]                                                                       |
| Voltage-dependent anion-selective channel protein 2            | Vdac2     | P81155           | ∞                      | +                                            |                 |                      | + [31]                                                                       |
